# Supplementary material for: Suspension TRAPping Filter (sTRAP) Sample Preparation for Quantitative Proteomics in the Low µg Input Range Using a Plasmid DNA Micro-Spin Column: Analysis of the Hippocampus from the 5xFAD Alzheimer’s Disease Mouse Model
Source: MDPI journal article supplement (doi:10.3390/cells12091242), 2023-04-25
Supplement: s1 [file s1]

**Table S2.** Dysregulated proteins in 5xFAD mice (log2FC: Log2 Fold Change. FDR: False Discovery Rate).

| Gene symbol           | log2FC | FDR  | Gene symbol | log2FC | FDR  | Gene symbol             | log2FC | FDR  | Gene symbol | log2FC | FDR  |
|-----------------------|--------|------|-------------|--------|------|-------------------------|--------|------|-------------|--------|------|
| Up-regulated proteins |        |      |             |        |      | Down-regulated proteins |        |      |             |        |      |
| VTN                   | 2.33   | 0.00 | NDFIP2      | 0.54   | 0.05 | BACE1                   | 0.31   | 0.01 | CNNM1       | -0.17  | 0.00 |
| MDK                   | 2.20   | 0.00 | LCP1        | 0.52   | 0.00 | VPS11                   | 0.31   | 0.00 | ELMO2       | -0.18  | 0.00 |
| APP                   | 1.80   | 0.00 | ENPP5       | 0.52   | 0.00 | EDIL3                   | 0.30   | 0.00 | NCALD       | -0.18  | 0.02 |
| APOE                  | 1.57   | 0.00 | MVK         | 0.52   | 0.00 | TMEM214                 | 0.30   | 0.03 | MMP17       | -0.19  | 0.04 |
| CAV1                  | 1.35   | 0.00 | GNS         | 0.52   | 0.00 | UGT8                    | 0.30   | 0.03 | SCN1A       | -0.19  | 0.05 |
| H2-L                  | 1.19   | 0.00 | MAN2B1      | 0.50   | 0.00 | LAMTOR1                 | 0.28   | 0.00 | CACNB2      | -0.19  | 0.01 |
| CAPG                  | 1.10   | 0.00 | PSMB8       | 0.50   | 0.04 | JAKMIP2                 | 0.28   | 0.00 | RAP2B       | -0.20  | 0.00 |
| C1QC                  | 0.95   | 0.00 | ARL8A       | 0.50   | 0.00 | VPS18                   | 0.28   | 0.00 | ARHGEF9     | -0.20  | 0.00 |
| LYZ2                  | 0.95   | 0.04 | TMEM106B    | 0.50   | 0.00 | CNN3                    | 0.28   | 0.03 | OLFM1       | -0.20  | 0.00 |
| C4B                   | 0.94   | 0.00 | HEXA        | 0.49   | 0.00 | APLP2                   | 0.27   | 0.00 | RHOT2       | -0.21  | 0.00 |
| H2-K1                 | 0.93   | 0.02 | CLSTN3      | 0.48   | 0.00 | MFGE8                   | 0.27   | 0.04 | SLC27A1     | -0.21  | 0.02 |
| CLU                   | 0.93   | 0.00 | NUDT16L1    | 0.47   | 0.04 | RLBP1                   | 0.27   | 0.02 | CPNE4       | -0.21  | 0.03 |
| SIDT2                 | 0.92   | 0.01 | NSDHL       | 0.47   | 0.02 | CTSL                    | 0.26   | 0.04 | AGFG2       | -0.21  | 0.04 |
| C1QB                  | 0.83   | 0.00 | PLBD2       | 0.46   | 0.00 | AKAP12                  | 0.25   | 0.03 | CADM2       | -0.21  | 0.01 |
| 1700006A1RIK          | 0.78   | 0.00 | RPGR        | 0.46   | 0.04 | PDLIM5                  | 0.24   | 0.03 | NLGN1       | -0.21  | 0.01 |
| C1QA                  | 0.77   | 0.01 | CSF1R       | 0.46   | 0.00 | RUNDC3A                 | 0.24   | 0.00 | SLITRK2     | -0.22  | 0.03 |
| HTRA1                 | 0.75   | 0.00 | PLD3        | 0.46   | 0.00 | TLN1                    | 0.24   | 0.00 | GRIK2       | -0.23  | 0.03 |
| B2M                   | 0.74   | 0.00 | ITGB2       | 0.46   | 0.01 | CLSTN1                  | 0.23   | 0.03 | NECTIN1     | -0.23  | 0.00 |
| STAT1                 | 0.71   | 0.00 | ARL8B       | 0.45   | 0.00 | VPS16                   | 0.23   | 0.00 | NDUFAB1     | -0.23  | 0.03 |
| HEXB                  | 0.70   | 0.00 | MSN         | 0.44   | 0.00 | RHEB                    | 0.22   | 0.02 | MDGA2       | -0.24  | 0.04 |
| MAN2A1                | 0.69   | 0.01 | SPOCK1      | 0.43   | 0.00 | UAP1L1                  | 0.22   | 0.04 | NETO1       | -0.24  | 0.04 |
| PTPRC                 | 0.69   | 0.04 | ATG9A       | 0.41   | 0.03 | ITFG1                   | 0.21   | 0.02 | IGLON5      | -0.25  | 0.05 |
| SLC36A1               | 0.68   | 0.04 | GM2A        | 0.41   | 0.01 | PDIA6                   | 0.20   | 0.04 | CNTFR       | -0.26  | 0.03 |
| GFAP                  | 0.67   | 0.00 | FLNA        | 0.41   | 0.00 | SERPINE2                | 0.20   | 0.04 | NDUFB8      | -0.28  | 0.02 |
| CLCN6                 | 0.67   | 0.00 | EPDR1       | 0.41   | 0.02 | P4HB                    | 0.20   | 0.00 | GPC4        | -0.28  | 0.02 |
| IRGM1                 | 0.66   | 0.00 | SERINC1     | 0.40   | 0.00 | BORCS5                  | 0.19   | 0.01 | FLRT2       | -0.29  | 0.03 |
| ITM2B                 | 0.66   | 0.00 | PLXDC2      | 0.39   | 0.01 | EHD4                    | 0.17   | 0.01 | ANKRD63     | -0.30  | 0.00 |
| MYO1B                 | 0.64   | 0.01 | CTSD        | 0.38   | 0.00 | HADH                    | 0.17   | 0.04 | GNAL        | -0.30  | 0.03 |
| FDPS                  | 0.64   | 0.00 | ARSB        | 0.38   | 0.00 | TRAPPC11                | 0.17   | 0.02 | ADCY6       | -0.31  | 0.03 |
| DAGLB                 | 0.63   | 0.00 | ACAT2       | 0.38   | 0.00 | WBP2                    | 0.16   | 0.02 | MDGA1       | -0.33  | 0.00 |
| SYT11                 | 0.63   | 0.00 | PIP4P2      | 0.38   | 0.04 | DOCK9                   | 0.14   | 0.00 | DGKB        | -0.34  | 0.00 |
| SPOCK2                | 0.62   | 0.00 | AIF1        | 0.37   | 0.04 | ERP29                   | 0.14   | 0.01 | NECTIN3     | -0.36  | 0.00 |
| WIPF1                 | 0.62   | 0.04 | CTSB        | 0.36   | 0.00 | VPS33A                  | 0.13   | 0.04 | NHS         | -0.36  | 0.02 |
| ABCA3                 | 0.62   | 0.00 | SERPINI1    | 0.36   | 0.00 | Down-regulated proteins |        |      | GRIK5       | -0.41  | 0.04 |
| S100A6                | 0.60   | 0.02 | ABCB6       | 0.36   | 0.01 | MARK2                   | -0.10  | 0.02 | CNOT7       | -0.47  | 0.04 |
| ITM2C                 | 0.60   | 0.00 | ATP9A       | 0.35   | 0.00 | EXOC4                   | -0.13  | 0.00 | KCNIP2      | -0.50  | 0.00 |
| APOD                  | 0.59   | 0.00 | VPS39       | 0.35   | 0.01 | PRKCG                   | -0.14  | 0.00 | CEMIP2      | -0.53  | 0.02 |
| NCSTN                 | 0.57   | 0.00 | SYT5        | 0.35   | 0.00 | RAPGEF4                 | -0.15  | 0.02 | AJAP1       | -0.58  | 0.04 |
| AHNAK                 | 0.57   | 0.01 | ACP2        | 0.34   | 0.00 | ARPC1A                  | -0.15  | 0.04 | MEGF10      | -0.58  | 0.02 |
| GM1673                | 0.57   | 0.03 | PSAP        | 0.34   | 0.00 | PDPK1                   | -0.15  | 0.01 | PATJ        | -0.60  | 0.03 |
| SLC38A9               | 0.56   | 0.04 | ARFGEF3     | 0.33   | 0.00 | RTN4RL2                 | -0.16  | 0.05 | PLAT        | -0.63  | 0.04 |
| IDS                   | 0.55   | 0.00 | VPS41       | 0.33   | 0.00 | TRHDE                   | -0.16  | 0.04 | SLC10A4     | -0.71  | 0.04 |
| SPG21                 | 0.54   | 0.00 | IPO4        | 0.32   | 0.00 | ADGRL1                  | -0.16  | 0.05 | USP12       | -0.76  | 0.03 |
| GAS8                  | 0.54   | 0.03 | RUNDC3B     | 0.32   | 0.02 | UNC13A                  | -0.17  | 0.00 | SMG8        | -1.01  | 0.00 |
