# Supplementary material for: Suspension TRAPping Filter (sTRAP) Sample Preparation for Quantitative Proteomics in the Low µg Input Range Using a Plasmid DNA Micro-Spin Column: Analysis of the Hippocampus from the 5xFAD Alzheimer’s Disease Mouse Model
Source: MDPI journal article supplement (doi:10.3390/cells12091242), 2023-04-25
Supplement: s1 [file s1]

**Table S1.** Quantification results for all the experiments.

| Sample                       | Proteins | Peptides | Group CoV | Sample                                                  | Proteins | Peptides | Group CoV |
|------------------------------|----------|----------|-----------|---------------------------------------------------------|----------|----------|-----------|
| <b>Serial Diluted -1.2%</b>  |          |          |           | 10µg a                                                  | 5,971    | 37,457   | 3.6       |
| 0.3µg a                      | 1,860    | 7,165    | 9.2       | 10µg b                                                  | 5,981    | 37,972   | 3.6       |
| 0.3µg b                      | 1,714    | 6,781    | 9.2       | 10µg c                                                  | 6,021    | 38,090   | 3.6       |
| 0.3µg c                      | 1,756    | 6,854    | 9.2       | 10µg d                                                  | 6,011    | 38,271   | 3.6       |
| 0.3µg d                      | 1,678    | 6,433    | 9.2       | <b>LC-MS implications test</b>                          |          |          |           |
| 0.6µg a                      | 2,746    | 12,360   | 11.3      | 25 ng a                                                 | 4,203    | 24,165   | 6         |
| 0.6µg b                      | 2,779    | 12,152   | 11.3      | 25 ng b                                                 | 4,128    | 24,233   | 6         |
| 0.6µg c                      | 2,702    | 12,056   | 11.3      | 25 ng c                                                 | 4,230    | 23,489   | 6         |
| 0.6µg d                      | 2,700    | 11,938   | 11.3      | 50 ng a                                                 | 4,183    | 34,656   | 3.8       |
| 1.25µg a                     | 3,431    | 16,263   | 6         | 50 ng b                                                 | 5,292    | 34,617   | 3.8       |
| 1.25µg b                     | 3,560    | 17,123   | 6         | 50 ng c                                                 | 5,280    | 34,490   | 3.8       |
| 1.25µg c                     | 3,490    | 16,734   | 6         | 100 ng a                                                | 6,175    | 45,625   | 3.4       |
| 1.25µg d                     | 3,525    | 16,771   | 6         | 100 ng b                                                | 6,161    | 45,621   | 3.4       |
| 2.5µg a                      | 4,152    | 22,208   | 4.3       | 100 ng c                                                | 6,163    | 45,581   | 3.4       |
| 2.5µg b                      | 4,166    | 22,254   | 4.3       | 200 ng a                                                | 6,696    | 52,190   | 3.2       |
| 2.5µg c                      | 4,159    | 22,334   | 4.3       | 200 ng b                                                | 6,696    | 51,696   | 3.2       |
| 2.5µg d                      | 4,210    | 22,526   | 4.3       | 200 ng c                                                | 6,686    | 52,090   | 3.2       |
| 5µg a                        | 5,106    | 30,139   | 3.4       | 400 ng a                                                | 6,923    | 52,694   | 5.7       |
| 5µg b                        | 5,186    | 30,440   | 3.4       | 400 ng b                                                | 6,931    | 52,760   | 5.7       |
| 5µg c                        | 5,136    | 30,043   | 3.4       | 400 ng c                                                | 6,909    | 52,659   | 5.7       |
| 5µg d                        | 5,192    | 30,531   | 3.4       | <b>In-gel/sTRAP protifi/sTRAP DNA micro-spin column</b> |          |          |           |
| 10µg a                       | 6,094    | 38,773   | 3.9       | Gel a                                                   | 5,683    | 48,574   | 6.7       |
| 10µg b                       | 6,092    | 39,186   | 3.9       | Gel b                                                   | 5,686    | 48,753   | 6.7       |
| 10µg c                       | 6,124    | 39,265   | 3.9       | Gel c                                                   | 5,638    | 48,242   | 6.7       |
| 10µg d                       | 6,112    | 39,448   | 3.9       | Protifi 1                                               | 6,127    | 56,913   | 3.2       |
| <b>Serial Diluted-120 ng</b> |          |          |           | Protifi 2                                               | 6,121    | 56,822   | 3.2       |
| 0.3µg a                      | 5,089    | 26,764   | 8.1       | Protifi 3                                               | 6,071    | 56,408   | 3.2       |
| 0.3µg b                      | 5,070    | 26,893   | 8.1       | DNA column 1                                            | 6,462    | 60,255   | 3.1       |
| 0.3µg c                      | 5,087    | 27,065   | 8.1       | DNA column 2                                            | 6,495    | 60,326   | 3.1       |
| 0.3µg d                      | 4,967    | 25,570   | 8.1       | DNA column 3                                            | 6,525    | 60,153   | 3.1       |
| 0.6µg a                      | 5,162    | 27,804   | 5.4       | <b>Animal study WT vs 5xFAD</b>                         |          |          |           |
| 0.6µg b                      | 5,135    | 26,872   | 5.4       | WT 1                                                    | 7,357    | 61,688   | 9.8       |
| 0.6µg c                      | 5,139    | 27,439   | 5.4       | WT 2                                                    | 7,135    | 57,748   | 9.8       |
| 0.6µg d                      | 5,176    | 27,664   | 5.4       | WT 3                                                    | 7,246    | 61,078   | 9.8       |
| 1.25µg a                     | 5,437    | 30,626   | 5.7       | WT 4                                                    | 7,416    | 62,949   | 9.8       |
| 1.25µg b                     | 5,573    | 31,804   | 5.7       | WT 5                                                    | 7,405    | 62,862   | 9.8       |
| 1.25µg c                     | 5,555    | 31,671   | 5.7       | WT 6                                                    | 7,395    | 62,249   | 9.8       |
| 1.25µg d                     | 5,556    | 31,466   | 5.7       | 5xFAD 1                                                 | 7,402    | 63,077   | 7.8       |
| 2.5µg a                      | 5,627    | 33,013   | 3.8       | 5xFAD 2                                                 | 7,381    | 61,783   | 7.8       |
| 2.5µg b                      | 5,595    | 32,937   | 3.8       | 5xFAD 3                                                 | 7,400    | 62,368   | 7.8       |
| 2.5µg c                      | 5,644    | 33,152   | 3.8       | 5xFAD 4                                                 | 7,205    | 58,837   | 7.8       |
| 2.5µg d                      | 5,617    | 32,915   | 3.8       | 5xFAD 5                                                 | 7,410    | 62,776   | 7.8       |
| 5µg a                        | 5,866    | 36,190   | 3.5       | 5xFAD 6                                                 | 7,455    | 63,471   | 7.8       |
| 5µg b                        | 5,938    | 36,760   | 3.5       |                                                         |          |          |           |
| 5µg c                        | 5,907    | 36,094   | 3.5       |                                                         |          |          |           |
| 5µg d                        | 5,920    | 36,507   | 3.5       |                                                         |          |          |           |
